# Supplementary material for: Anisotropic properties and Raman spectra of a LiNa5Mo9O30 single crystal grown by the TSSG method
Source: Royal Society of Chemistry journal article supplement (doi:10.1039/d0ce01129k), 2020-01-01
Supplement: d0ce01129k1.pdf [file d0ce01129k1.pdf]

## **Anisotropic Properties and Raman Spectra of $\text{LiNa}_5\text{Mo}_9\text{O}_{30}$ Single**

### **Crystal grown by TSSG method**

Xiaoli Du, Zeliang Gao,\* Fuan Liu, Xiaojie Guo, Xiangmei Wang, Youxuan Sun and Xutang Tao\*  
State Key Laboratory of Crystal Materials & Institute of Crystal Materials, Shandong University,  
No. 27 Shanda South Road, Jinan 250100, P.R. China.

Email: [txt@sdu.edu.cn](mailto:txt@sdu.edu.cn), [gaozeliang@sdu.edu.cn](mailto:gaozeliang@sdu.edu.cn)

### **Table of Contents**

**Fig. S1** Element detection of  $\text{LiNa}_5\text{Mo}_9\text{O}_{30}$  crystal by SEM/EDS.

**Table S1** Table of element measurement of  $\text{LiNa}_5\text{Mo}_9\text{O}_{30}$  by SEM/EDS.

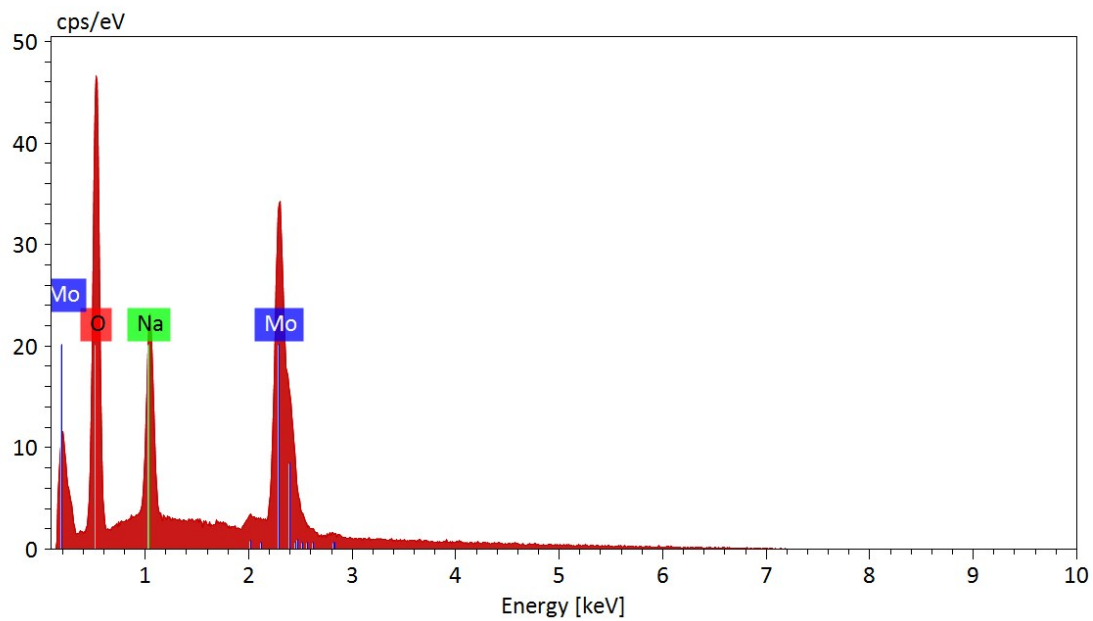

**Fig. S1** Element detection of  $\text{LiNa}_5\text{Mo}_9\text{O}_{30}$  crystal by SEM/EDS.

**Table S1** Table of element measurement of  $\text{LiNa}_5\text{Mo}_9\text{O}_{30}$  by SEM/EDS.

| Element | Normalized mass (%) | Atom (%) |
|---------|---------------------|----------|
| O       | 57.90               | 84.91    |
| Mo      | 35.92               | 8.79     |
| Na      | 6.18                | 6.31     |
